# Supplementary material
Source: Springer Nature journal article supplement (https://www.springermedizin.de/resource/supplementary/12913_2008_889_MOESM4_ESM.pdf/9536220)

## Knowledge access facilities

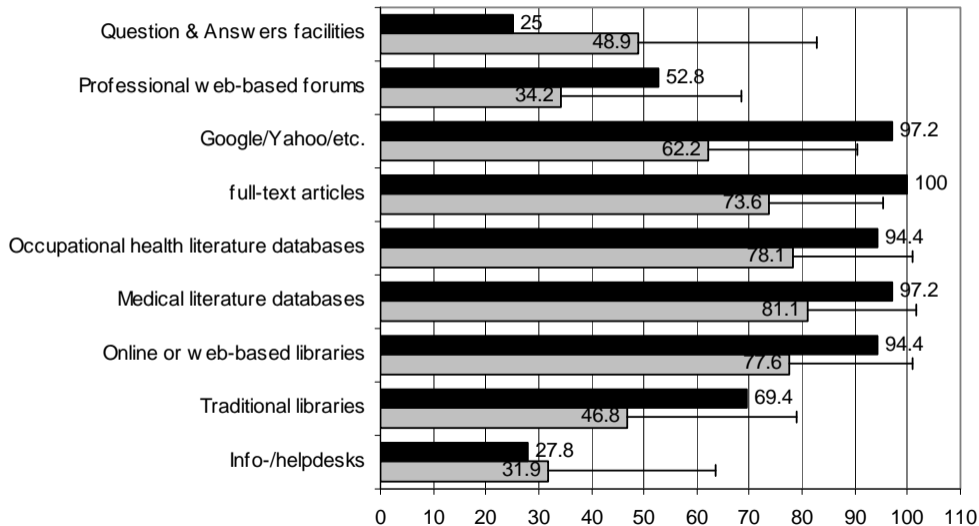

■ % OPs use:

■ Importance  
(0-100):

Supplement: MOESM4 [file 9536220]
